# Supplementary material for: Disaster Preparedness Should Represent an Augmentation of the Everyday Trauma System – But Are We Prepared?
Source: Research Square preprint supplement (doi:10.21203/rs.3.rs-103685/v1), 2020-11-12
Supplement: Supplementary file 1 [file b7f8bfb87ab18bfa4f333021.docx]

Table 1: Translated version of the topics in the survey

| Years of experience |  |  |  |
| --- | --- | --- | --- |
| ATLS / Trauma nursing course* |  |  |  |
| DSTC** |  |  |  |
| Knowledge of the hospital’s MCI plan |  |  |  |
| Read MCI plan within last 6 months |  |  |  |
| Familiar with own role during an MCI |  |  |  |
| Would feel competent during an MCI |  |  |  |
| Confident with own hospital’s competency during an MCI |  |  |  |
| Increased focus on MCI preparedness after July 22, 2011 |  |  |  |
| Number of trauma team simulations per year |  |  |  |
| Last participation in trauma team simulation*** |  |  |  |
| Hospital MCI exercises per year |  |  |  |
| Last participation in MCI alertness exercise*** |  |  |  |
| Hospital triage tabletop exercises per year |  |  |  |
| Last participation in triage tabletop exercise*** |  |  |  |
| Hospital ER evacuation exercises per year |  |  |  |
| Last participation in hospital ER evacuation exercise*** |  |  |  |
| Hospital ICU evacuation exercises per year |  |  |  |
| Last participation in hospital ICU exercise*** |  |  |  |
| Hospital MCI exercises per year |  |  |  |
| Last participation on hospital MCI exercise*** |  |  |  |

ATLS, advanced trauma life support; *TNCC (trauma nursing care course), ATCN (advanced trauma care for nurses) or KITS (Norwegian trauma care course); DSTC, definitive surgical trauma care; **or equivalent; MCI, mass casualty incident; ***time given in months; ER, emergency room; ICU, intensive care unit
